# Supplementary figures and images for: Measurement of enzyme activity of insoluble substrates based on ordered porous layer interferometry and the application in evaluation of thrombolytic drugs
Source: Royal Society of Chemistry journal article supplement (doi:10.1039/d3an02054a), 2024-01-01

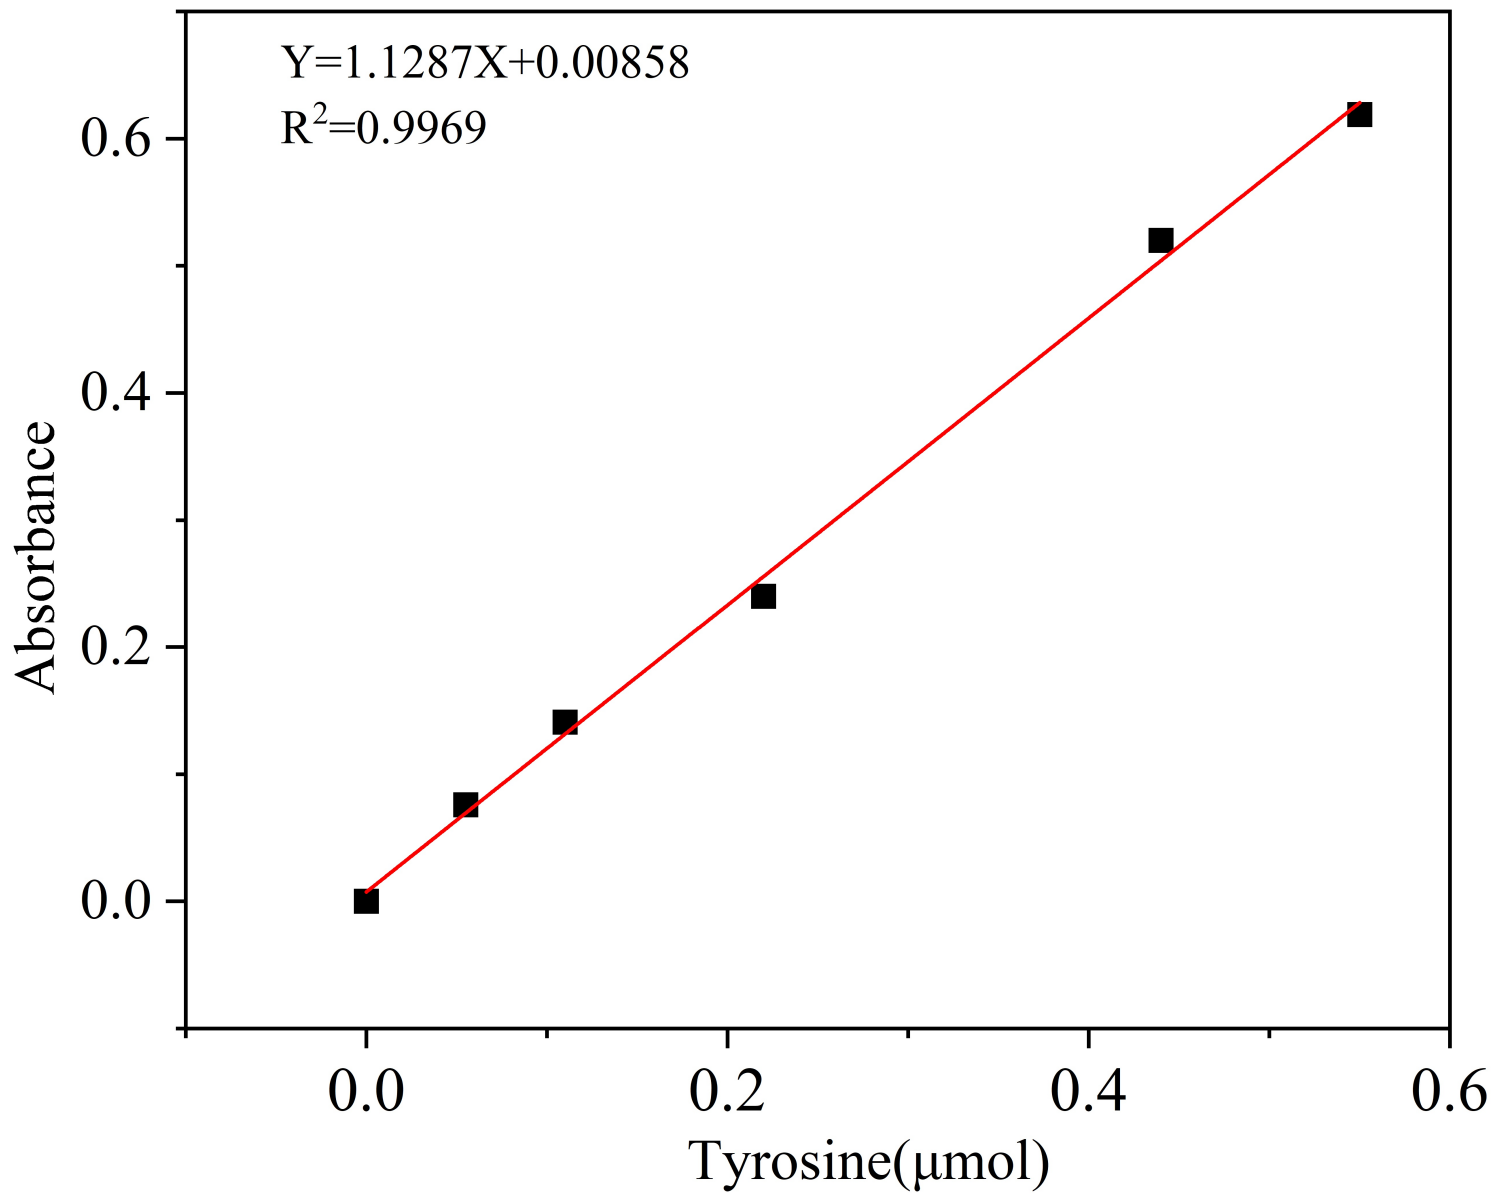

Supplement: d3an02054a2.pdf [file d3an02054a2.pdf]

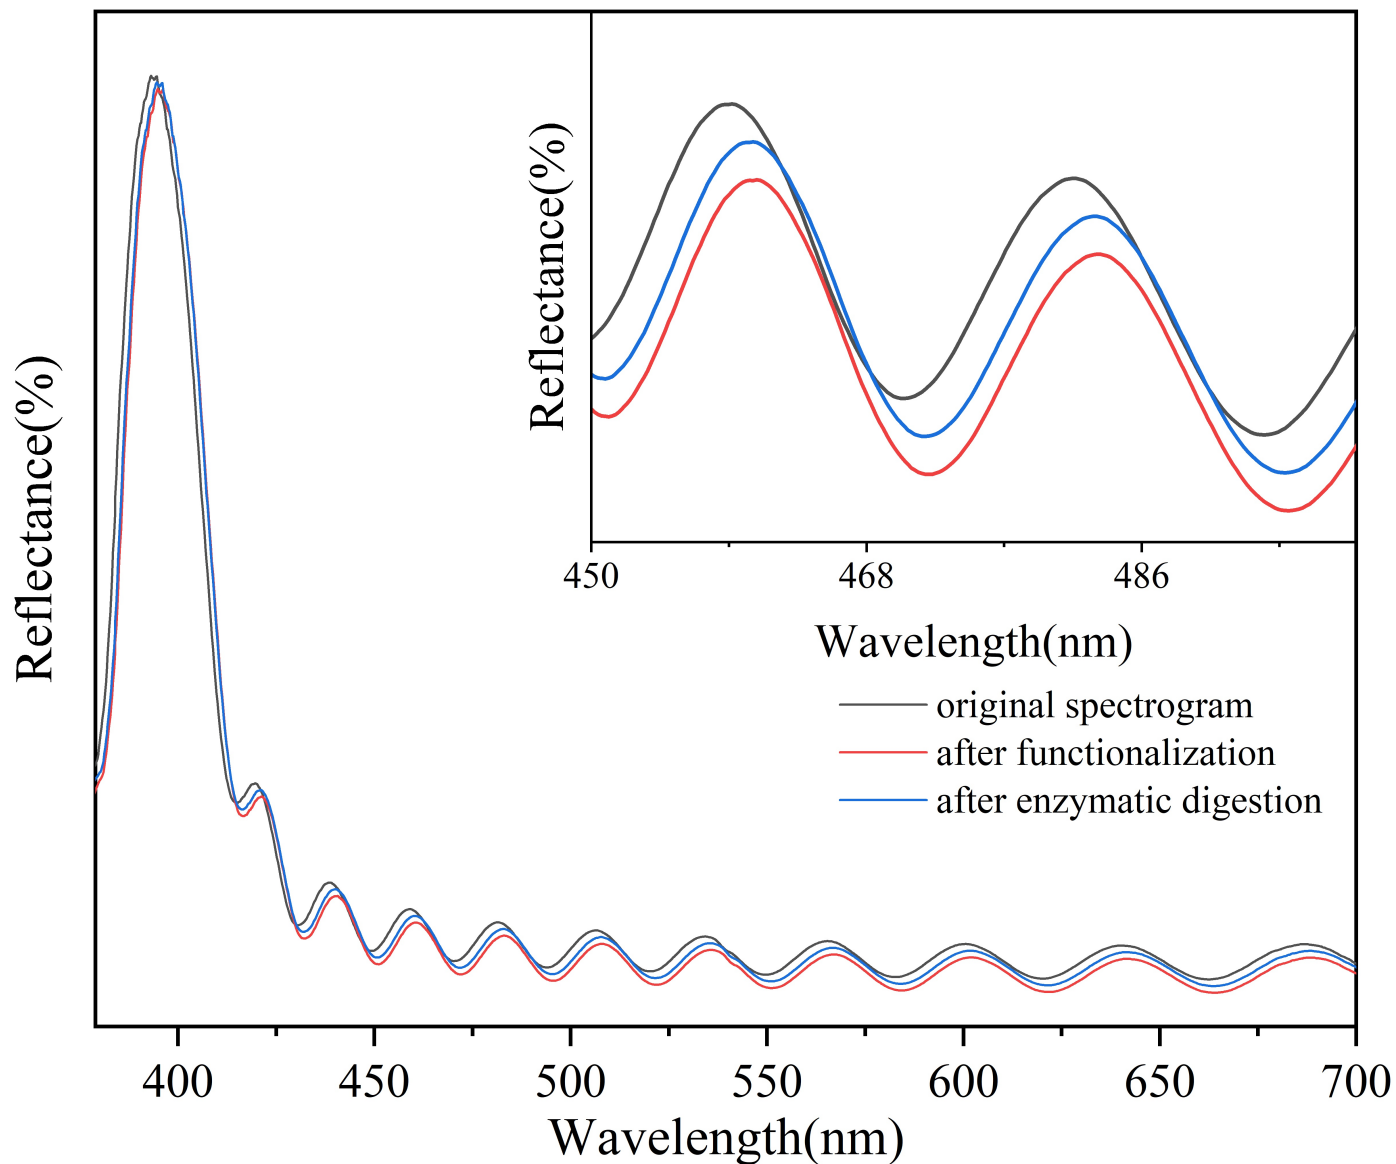

Supplement: d3an02054a3.pdf [file d3an02054a3.pdf]

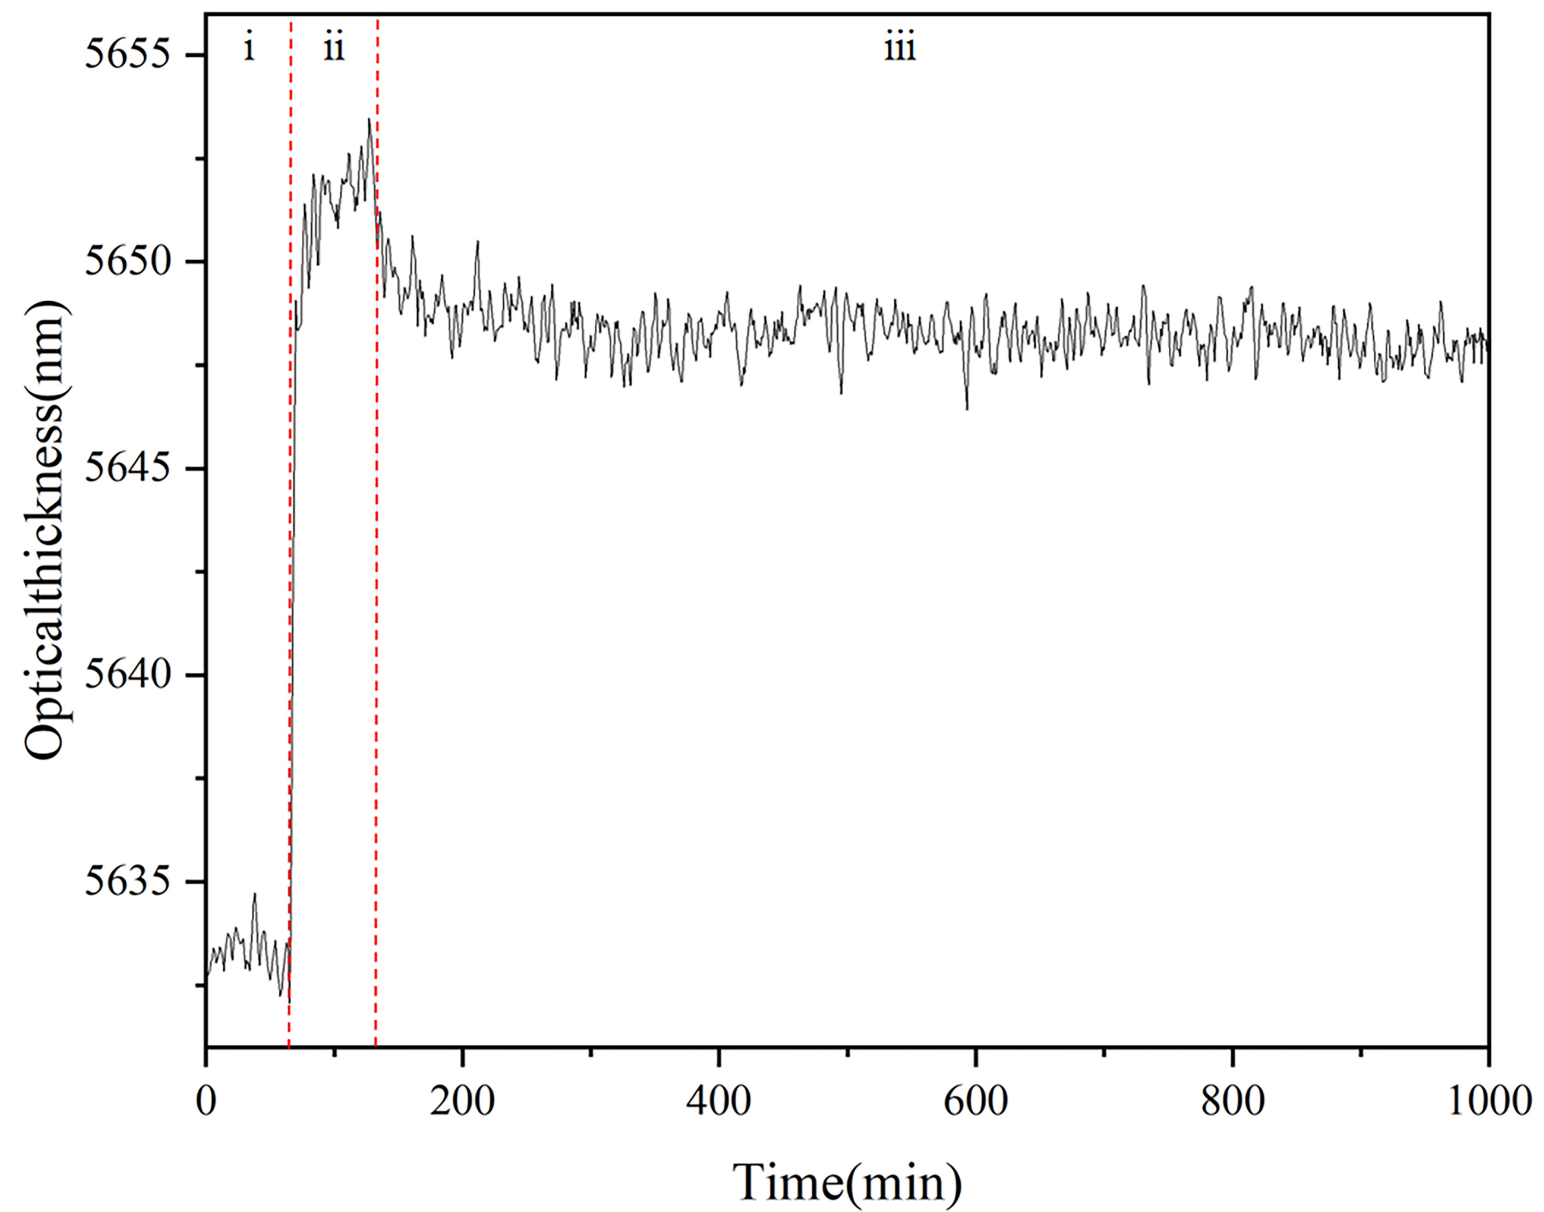

Supplement: d3an02054a4.pdf [file d3an02054a4.pdf]

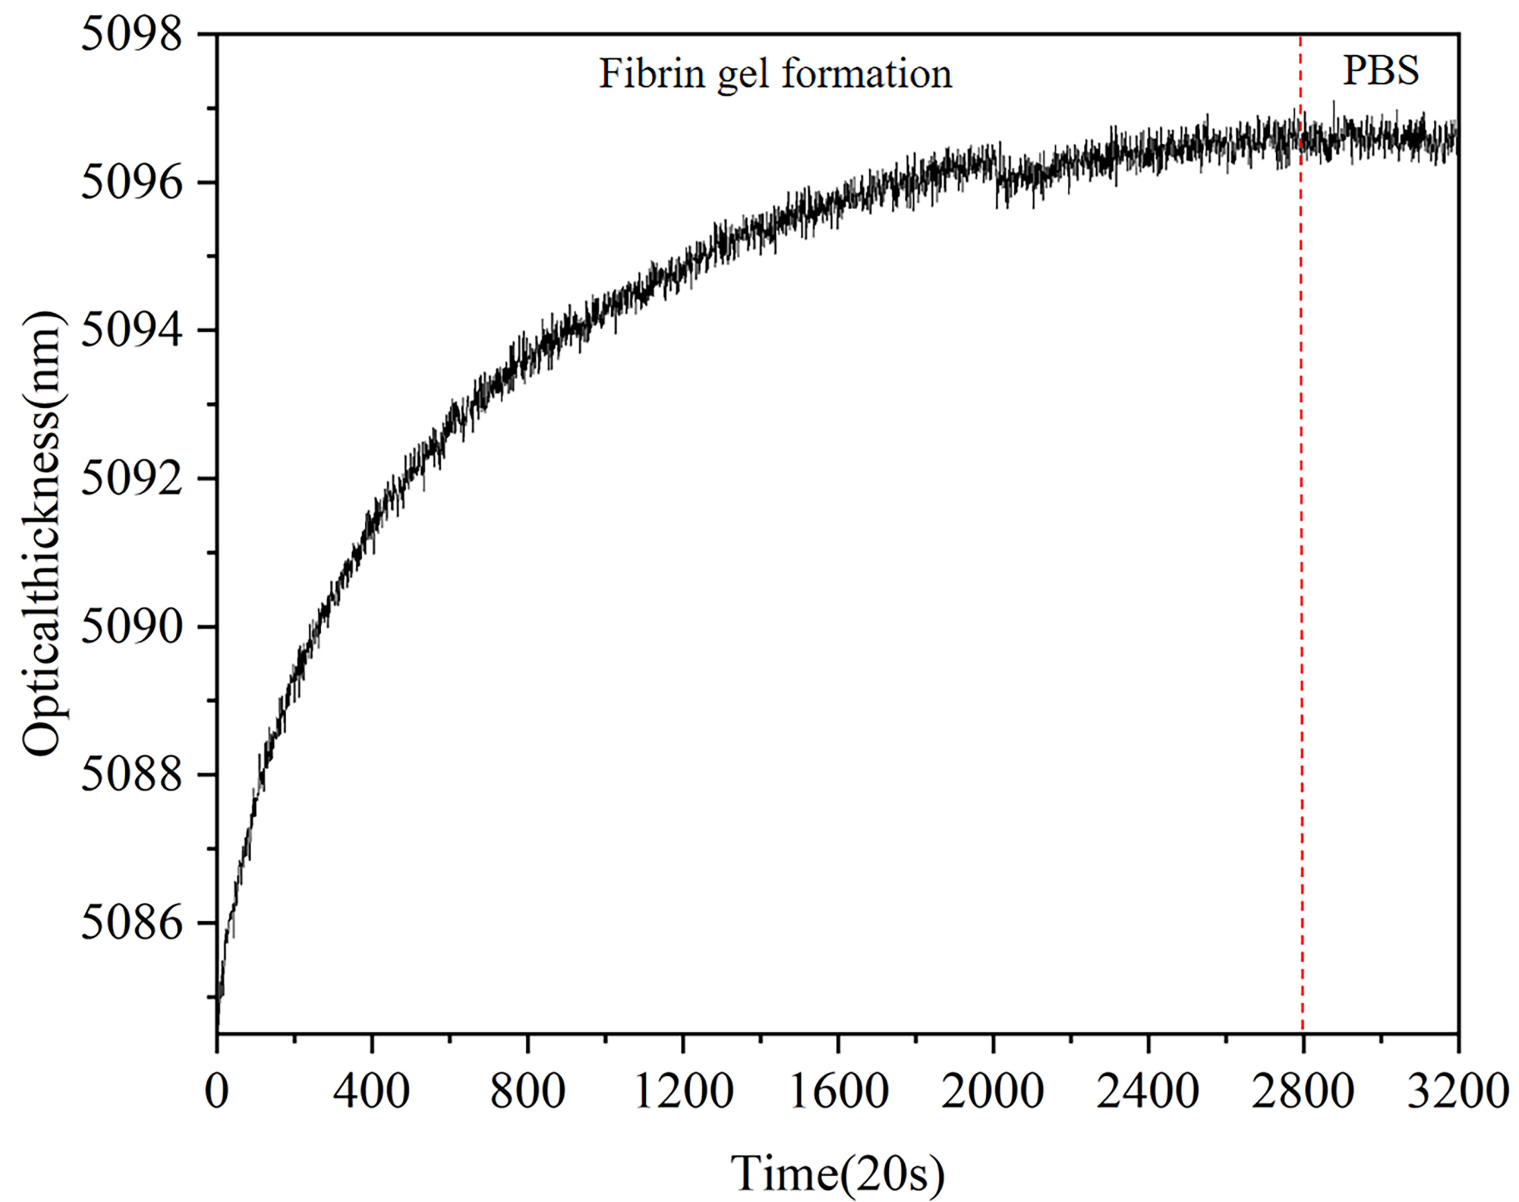

Supplement: d3an02054a5.pdf [file d3an02054a5.pdf]
